# Supplementary material for: Innovative Transformation and Valorisation of Red Mill Scale Waste into Ferroalloys: Carbothermic Reduction in the Presence of Alumina
Source: MDPI journal article supplement (doi:10.3390/su152416810), 2023-12-13
Supplement: s1 [file s1]

Archive with 1 entries (1 files):
- sustainability-2724801-supplementary.pdf
