# Supplementary material for: Innovative Transformation and Valorisation of Red Mill Scale Waste into Ferroalloys: Carbothermic Reduction in the Presence of Alumina
Source: MDPI journal article supplement (doi:10.3390/su152416810), 2023-12-13
Supplement: s1 [file s1 › sustainability-2724801-supplementary.pdf]

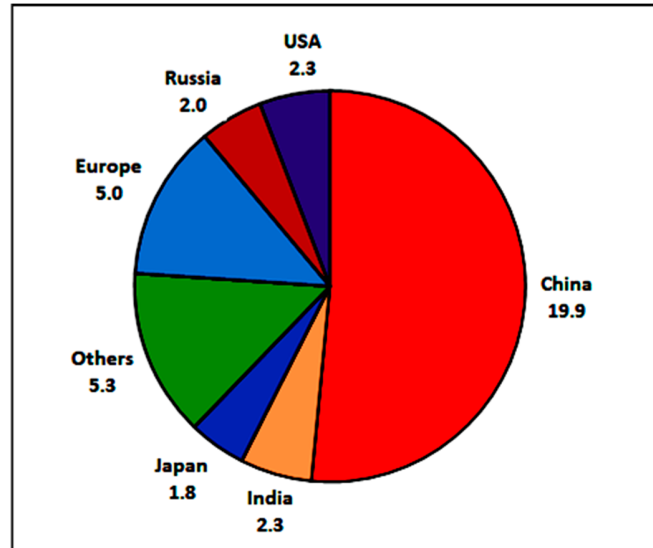

**Figure S1:** A schematic representation of primary mill scale produced in different regions around the world in 2021.

The mill scale volumes were computed as being 2% of the total steel produced in different regions of the world [1].

1. Major Steel-Producing Countries 2021 and 2020 Million Tonnes, Crude Steel Production.

Available online: <https://worldsteel.org/steel-topics/statistics/world-steel-in-figures-2022/>

(accessed on 25 September 2023).

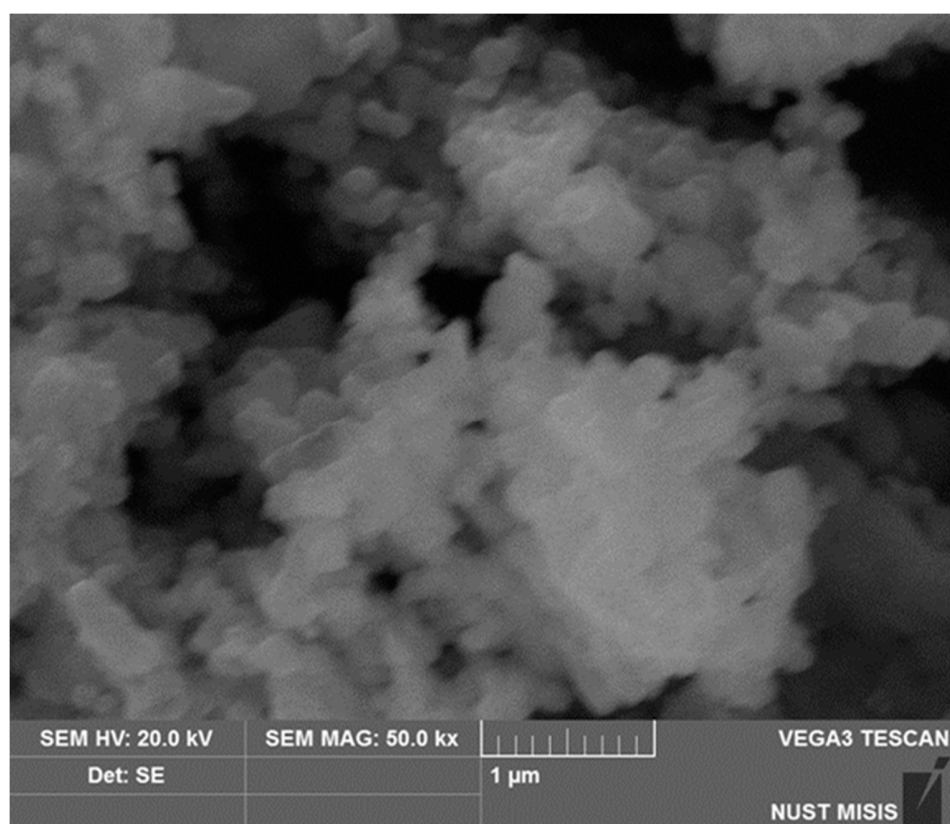

**Figure S2.** SEM image of the red mill scale used in this investigation.

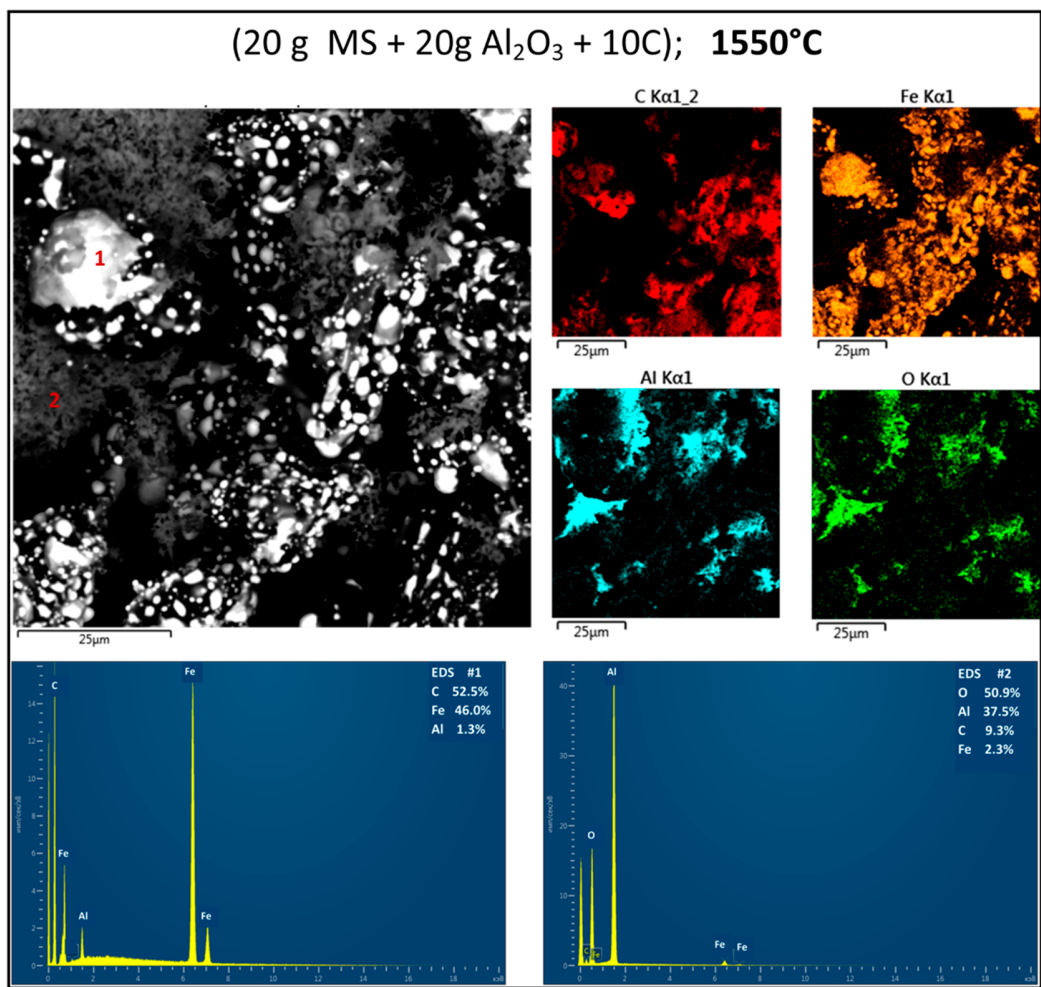

**Figure S3.** SEM/EDS/elemental mapping results for the (20g red MS+20g Al<sub>2</sub>O<sub>3</sub>+10g C) system heat treated at 1550°C.

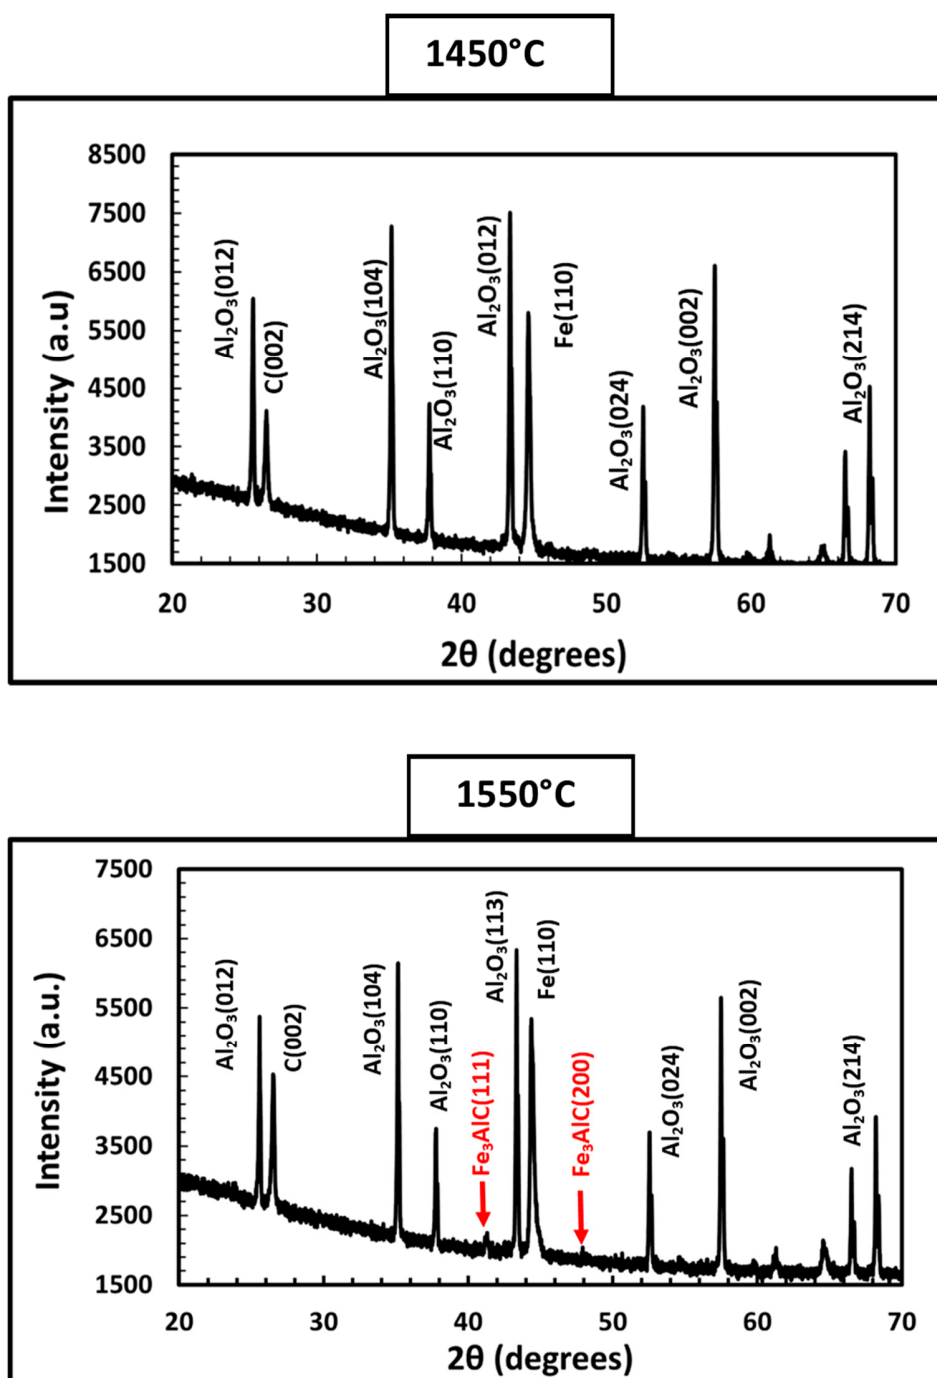

**Figure S4.** X-ray diffraction patterns for the (20g red MS+20g Al<sub>2</sub>O<sub>3</sub>+10g C) system after heat treatments at 1450°C and 1550°C

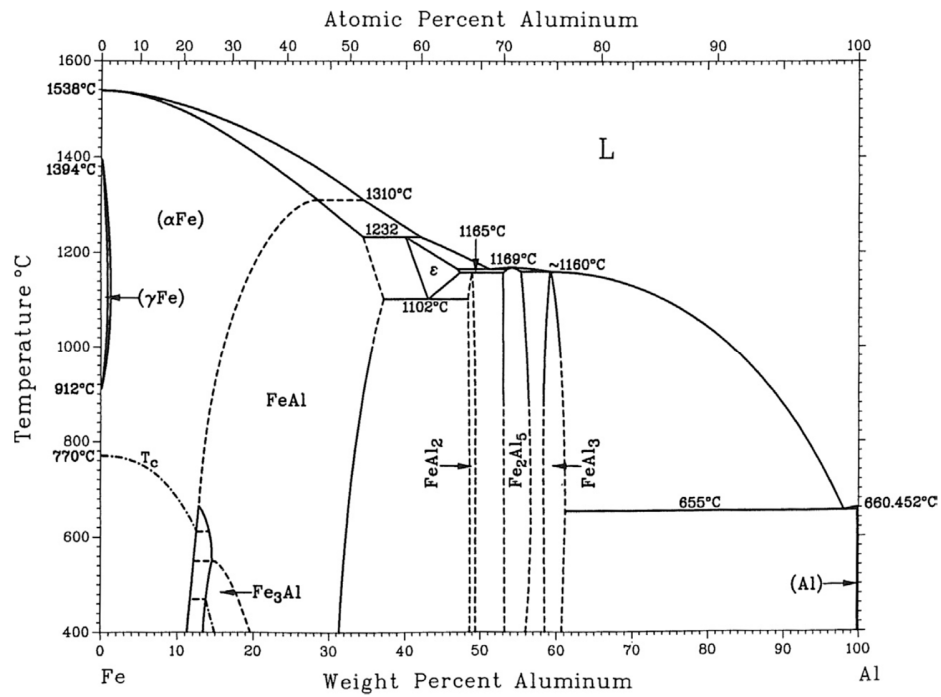

**Figure S5.** Binary Fe-Al phase diagram [1]

[1] Murray, J.L. Fe-Al binary phase diagram. In Alloy Phase Diagrams; Baker, H., Ed.; ASM International: Materials Park, OH, USA, 1992; Volume 54.

**Table S1.** Composition of red MS as determined by XRF data on several particulates.

| Spectrum<br>(wt.%) | 1    | 2    | 3    | 4    | 5    |
|--------------------|------|------|------|------|------|
| Fe                 | 65.9 | 73   | 68.2 | 74.2 | 72.3 |
| O                  | 33.6 | 26.6 | 31.4 | 24.8 | 27.4 |
| Cl                 | 0.5  | 0.4  | 0.4  | 0.7  | 0.3  |
| Mn                 | -    | -    | -    | 0.3  | -    |

Table S2. BET surface area data on red MS.

Quantachrome NovaWin2 - Data Acquisition and Reduction  
for NOVA instruments  
©1994-2007, Quantachrome Instruments  
version 9.0

**Analysis**

Operator: MISIS  
Sample ID: Minhhh  
Sample Desc: Minhhh  
Sample weight: 0.2448 g  
Outgas Time: 3.0 hrs  
Analysis gas: Nitrogen  
Press. Tolerance: 0.200/0.200 (ads/des)  
Analysis Time: 23.8 min  
Cell ID: 67

Date: 2015/03/12  
Filename: D:\NOVA\Physisorb\2016\Nova\Minhhh.qps  
Comment: Minhhh  
Sample Volume: 0.08179 cc  
Outgas Temp: 300.0 C  
Bath Temp: 77.3 K  
Equil time: 60/60 sec (ads/des)  
End of run: 2015/03/12 2:48:14

**Report**

Operator: D:\NOVA\Physisorb\2016\Nova\Minhhh.qps  
Date: 12/1/2023  
Equil timeout: 240/240 sec (ads/des)  
Instrument: Nova Station A

**Multi-Point BET**

**Data Reduction Parameters Data**

|                  |                      |                |                       |                            |
|------------------|----------------------|----------------|-----------------------|----------------------------|
| <u>Adsorbate</u> | Nitrogen             | Temperature    | 77.350 K              | Liquid Density: 0.808 g/cc |
|                  | Molec. Wt.: 28.013 g | Cross Section: | 16.200 Å <sup>2</sup> |                            |

**Multi-Point BET Data**

| Relative Pressure<br>[P/P <sub>0</sub> ] | Volume @ STP<br>[cc/g] | 1 / [ W((P <sub>0</sub> /P) - 1) ] | Relative Pressure<br>[P/P <sub>0</sub> ] | Volume @ STP<br>[cc/g] | 1 / [ W((P <sub>0</sub> /P) - 1) ] |
|------------------------------------------|------------------------|------------------------------------|------------------------------------------|------------------------|------------------------------------|
| 4.56180e-02                              | 0.9260                 | 4.1301e+01                         | 1.99628e-01                              | 1.8053                 | 1.1054e+02                         |
| 9.78150e-02                              | 1.2370                 | 7.0127e+01                         | 2.50003e-01                              | 2.0855                 | 1.2789e+02                         |
| 1.48984e-01                              | 1.5306                 | 9.1516e+01                         | 3.00130e-01                              | 2.3808                 | 1.4412e+02                         |

**BET summary**

Slope = 397.185  
Intercept = 2.859e+01  
Correlation coefficient, r = 0.995053  
C constant = 14.891  
Surface Area = 8.179 m<sup>2</sup>/g
